# Supplementary material
Source: publisher figshare collection journal article supplement (https://gsajournals.figshare.com/ndownloader/files/21269292)
Supplement: Supplementary file 1 [file 21269292]

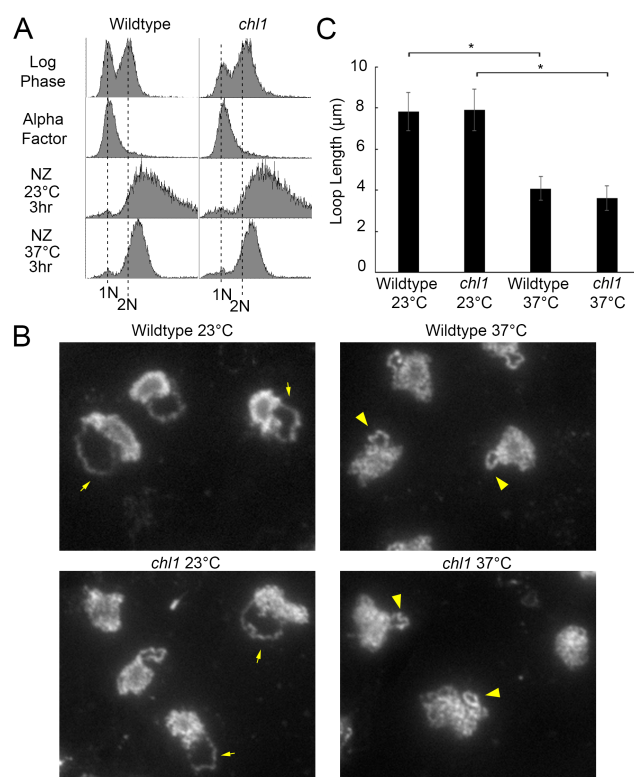

**Supplemental Figure 1. Chl1 DNA helicase does not function in hyperthermic-induced rDNA hypercondensation.** A) Flow cytometer data of DNA content. Log phase cultures were synchronized in G1 using alpha factor and aliquots released into either 23°C or 37°C fresh media supplemented with nocodazole and incubated for 3 hours. B) Chromosomal mass and rDNA loop structures detected using DAPI. Yellow arrows indicate long rDNA loops. Yellow arrowheads indicate short rDNA loops. All field of views are shown at equal magnification. C) Quantification of condensed rDNA loop lengths in wildtype (YPH499) and *chl1* deletion mutant cells (YBS1141). Data shown was obtained from 3 biological replicates with at least 100 cells for each strain analyzed per replicate. Error bars represent standard deviation of each sample. Statistical analysis was performed using Tukey HSD one way ANOVA. P-Value = 0.001 indicates a significant difference between the average loop lengths of wildtype cells at 23°C versus 37°C. P-Value = 0.001 indicates significant differences between the average loop lengths of *chl1* mutant cells at 23°C versus 37°C. P-Value = 0.899 indicates there is no significant difference between the average loop lengths of wildtype versus *chl1* mutant cells at 23°C. P-Value = 0.882 indicates there is no significant difference between the average loop lengths of wildtype versus *chl1* mutant cells at 37°C. Statistically significant differences (\*) are based on  $P < 0.05$ . Wildtype rDNA loop measurements adapted from Figure 1E, Shen and Skibbens 2017a, under the terms of the Creative Commons Attribution-NonCommercial-NoDerivatives License.

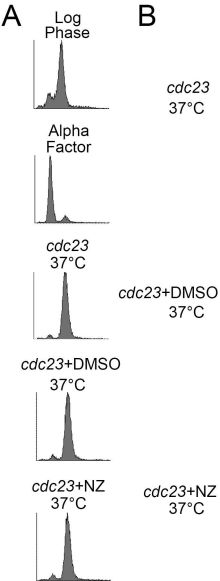

**Supplemental Figure 2. rDNA hypercondensation can be induced prior to anaphase onset.** A) Flow cytometer data of DNA content. Log phase cultures of *cdc23-1* were synchronized in G1 using alpha factor and aliquots released into fresh medium alone or medium supplemented with DMSO (+DMSO) or nocodazole (+NZ) and incubated for 3 hours at 37°C. B) Chromosomal mass and rDNA loop structures were detected using DAPI. All field of views are shown at equal magnification. Red arrows indicate distorted chromatin structures, often appearing as two roughly equal masses of chromatin tethered together near a constriction point. These likely reflect chromatin masses under tension due to microtubule spindle forces. Yellow arrows indicate hypercondensed rDNA loops. Hypercondensed rDNA loops are clearly present in cells that harbor temperature-sensitive alleles of *cdc23-1* (FLY83/H23C1AX) at all three conditions.

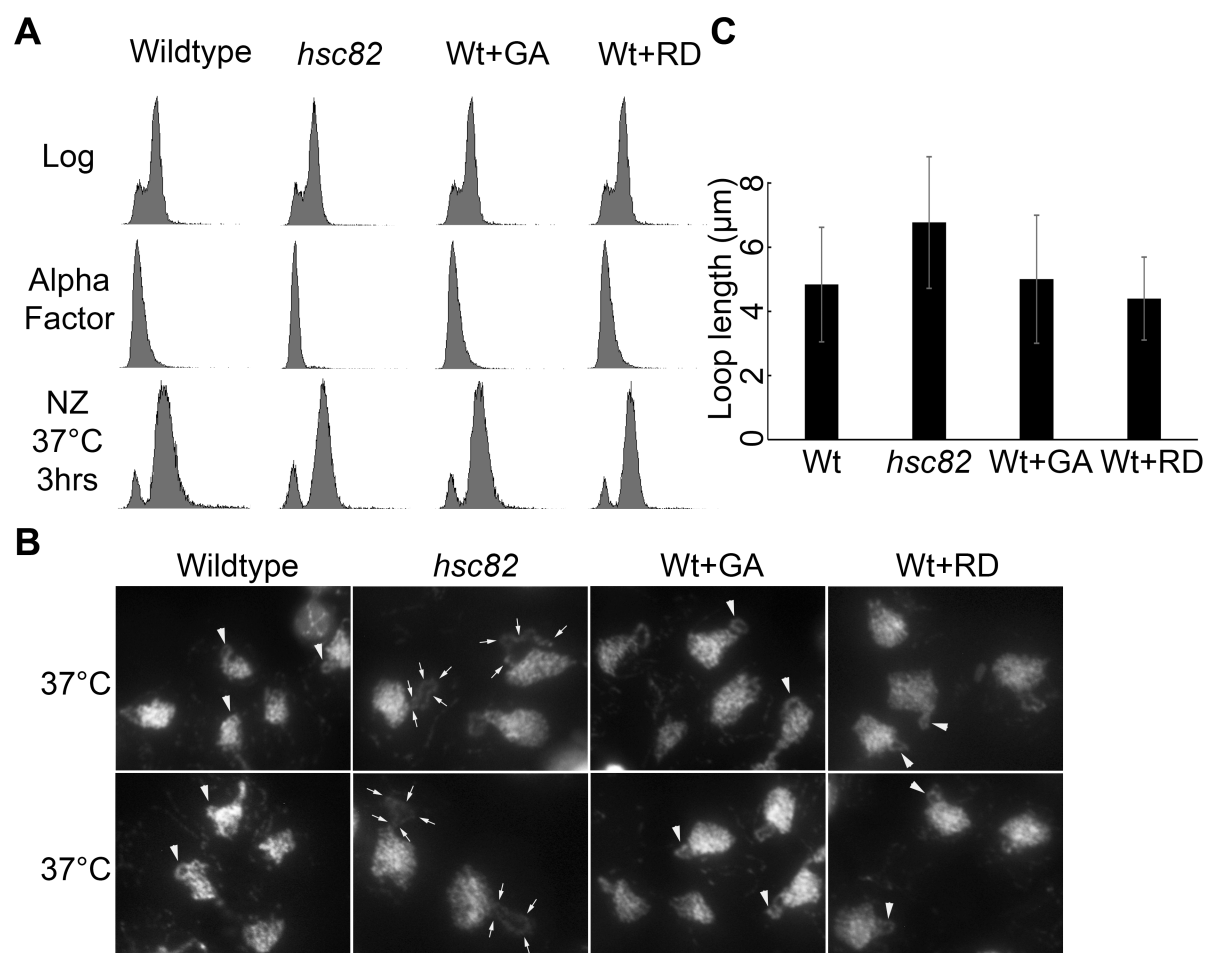

**Supplemental Figure 3. Independent confirmation that Hsp90 protein promotes hyperthermic-induced rDNA hypercondensation and the impact of Hps90 inhibitors.** A) Flow cytometer data documents DNA content for wildtype (BY4741) and *hsc82* (YDS210) null cells. Log phase cells were synchronized in G1 using alpha factor, then released into 37°C fresh medium supplemented with nocodazole for 3 hours to arrest cells in preanaphase. Wildtype cells were further treated with Geldanamycin (GA) or Radicicol (RD), in addition to NZ, which is reflected by duplicated Log and G1 DNA profiles for those treatments. B) Chromosomal mass and rDNA loop structures detected using DAPI. White arrows indicate the track of rDNA long loops, arrowheads indicate rDNA short loops. C) Quantification of loop lengths of condensed rDNA in wildtype (BY4741) and *hsc82* null cells (YDS210). At least 100 cells for each strain were analyzed. Error bars represent standard deviation of each sample. Statistical analysis performed using Tukey HSD one-way ANOVA. P-Value = 0.001 indicates significant differences between the average loop lengths of wildtype cells versus the *hsc82* mutant cells at 37°C. Statistically significant differences (\*) are based on  $P < 0.05$ .

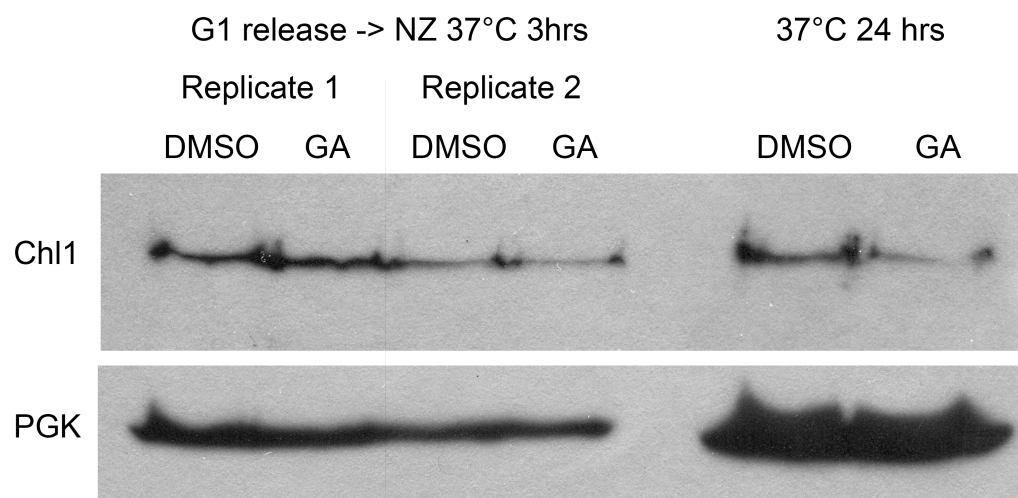

**Supplemental Figure 4. Geldanamycin inhibits Hsp90 ATPase activity, resulting in Chl1 degradation.** Cells (YBS1129) expressing MYC-tagged Chl1 were exposed to short (3 hours) versus long (24 hours) incubations in 37°C fresh medium supplemented with nocodazole and either vehicle (DMSO) or 40μM GA, post G1 synchronization/release. As previously reported, cells exposed to 37°C in medium supplemented with nocodazole (NZ) and Geldanamycin (GA) for short durations (3 hrs) retain relatively high levels of Chl1. In contrast, cells exposed to GA for an extended period of time (24 hrs), contain dramatically reduced levels of Chl1, compared to DMSO vehicle. Phosphoglycerate kinase (PGK) levels are shown as an internal loading control.



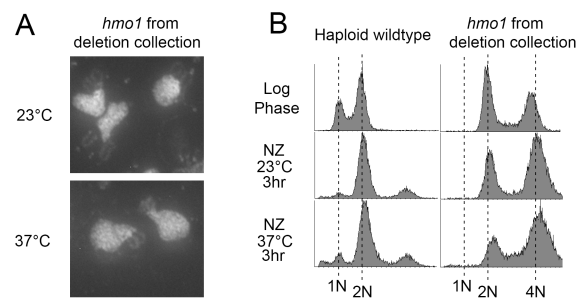

**Supplemental Figure 5. Diploidization of *hmo1* strain obtained from the yeast deletion collection.** A) Chromosomal mass and rDNA loop structures detected using DAPI. The majority of DNA masses exhibit two rDNA loops. B) Flow cytometer of DNA content. Log phase wildtype (YDS202) and *hmo1* null strains (obtained from yeast deletion collection – a generous gift from Prof Greg Lang) were split and equal portions placed in fresh medium supplemented with nocodazole and incubated for 3 hours at either 23°C or 37°C.
